# Supplementary material for: Monte-Carlo Simulation Based Value-at-Risk for Non-Gaussian Seasonal Stochastic Volatility Model
Source: Research Square preprint supplement (doi:10.21203/rs.3.rs-4090690/v1), 2024-03-22
Supplement: Supplementary file 1 [file 01cf51a72f78781a09af4b8a.xlsx]

## Sheet: Sheet1
Strike	Price
2.39	0.2002
2.44	0.1747
2.49	0.1517
2.51	0.1433
2.55	0.1275
2.56	0.1237
2.57	0.1201
2.65	0.0943
2.75	0.0691
2.84	0.052
2.85	0.0504
3	0.0321
3.25	0.0152
4	0.0013
