# Supplementary material for: Monte-Carlo Simulation Based Value-at-Risk for Non-Gaussian Seasonal Stochastic Volatility Model
Source: Research Square preprint supplement (doi:10.21203/rs.3.rs-4090690/v1), 2024-03-22
Supplement: Supplementary file 2 [file 3f4587cd08adfd4268bf66ea.xlsx]

## Sheet: Sheet1
Date	Price
24-01-20	1.3545
27-01-20	1.323
28-01-20	1.3078
29-01-20	1.3171
30-01-20	1.3267
31-01-20	1.3111
03-02-20	1.3102
04-02-20	1.2892
05-02-20	1.3054
06-02-20	1.3268
07-02-20	1.3428
10-02-20	1.3419
11-02-20	1.3345
12-02-20	1.3359
13-02-20	1.3715
14-02-20	1.3678
18-02-20	1.3744
19-02-20	1.3806
20-02-20	1.4026
21-02-20	1.4028
24-02-20	1.3858
25-02-20	1.3655
26-02-20	1.3296
27-02-20	1.3065
28-02-20	1.2975
02-03-20	1.2684
03-03-20	1.3186
04-03-20	1.31
05-03-20	1.3209
06-03-20	1.3078
09-03-20	1.247
10-03-20	1.1066
11-03-20	1.1449
12-03-20	1.1262
13-03-20	1.0475
16-03-20	1.0254
17-03-20	0.922
18-03-20	0.9316
19-03-20	0.8436
20-03-20	0.8948
23-03-20	0.8424
24-03-20	0.8298
25-03-20	0.8389
26-03-20	0.9168
27-03-20	0.9264
30-03-20	0.9389
31-03-20	0.9486
01-04-20	0.9456
02-04-20	0.9231
03-04-20	0.9638
06-04-20	0.9573
07-04-20	0.9724
08-04-20	0.9792
09-04-20	0.9955
13-04-20	0.9885
14-04-20	0.9994
15-04-20	1.0023
16-04-20	0.9727
17-04-20	0.9712
20-04-20	0.9758
21-04-20	0.9409
22-04-20	0.8334
23-04-20	0.904
24-04-20	0.9037
27-04-20	0.9081
28-04-20	0.8971
29-04-20	0.9049
30-04-20	0.9057
01-05-20	0.9401
04-05-20	0.927
05-05-20	0.9477
06-05-20	0.9897
07-05-20	0.9613
08-05-20	0.9727
11-05-20	1.0137
13-05-20	0.9841
18-05-20	0.9975
19-05-20	1.0457
20-05-20	1.0479
21-05-20	1.0569
22-05-20	1.0608
27-05-20	1.083
28-05-20	1.0658
29-05-20	1.0741
01-06-20	1.1075
02-06-20	1.1041
03-06-20	1.1246
04-06-20	1.1334
08-06-20	1.1904
09-06-20	1.1646
10-06-20	1.1827
11-06-20	1.1799
17-06-20	1.1668
18-06-20	1.1546
19-06-20	1.1294
22-06-20	1.1398
23-06-20	1.1599
24-06-20	1.1553
25-06-20	1.1018
26-06-20	1.1097
29-06-20	1.1006
30-06-20	1.126
01-07-20	1.1167
02-07-20	1.1294
06-07-20	1.1555
07-07-20	1.1533
08-07-20	1.1657
09-07-20	1.177
10-07-20	1.1524
13-07-20	1.1713
14-07-20	1.1558
20-07-20	1.1498
21-07-20	1.1633
22-07-20	1.1872
23-07-20	1.1902
24-07-20	1.1701
27-07-20	1.188
28-07-20	1.1889
29-07-20	1.1854
30-07-20	1.1873
31-07-20	1.1662
03-08-20	1.2108
04-08-20	1.2147
05-08-20	1.2248
06-08-20	1.227
07-08-20	1.2124
10-08-20	1.2309
11-08-20	1.2265
12-08-20	1.2448
13-08-20	1.2414
14-08-20	1.2525
17-08-20	1.2704
18-08-20	1.2748
19-08-20	1.274
20-08-20	1.2667
21-08-20	1.2486
24-08-20	1.2682
25-08-20	1.2798
26-08-20	1.2811
27-08-20	1.2617
28-08-20	1.2781
31-08-20	1.2637
01-09-20	1.2734
02-09-20	1.2517
03-09-20	1.2534
04-09-20	1.2281
08-09-20	1.1783
09-09-20	1.2001
10-09-20	1.1887
11-09-20	1.1841
14-09-20	1.1927
15-09-20	1.2146
16-09-20	1.2468
17-09-20	1.2594
18-09-20	1.257
21-09-20	1.2159
22-09-20	1.2137
23-09-20	1.2223
24-09-20	1.2279
25-09-20	1.2249
28-09-20	1.2336
29-09-20	1.2009
30-09-20	1.2165
01-10-20	1.1907
02-10-20	1.1601
05-10-20	1.2091
06-10-20	1.2417
07-10-20	1.2239
08-10-20	1.2494
09-10-20	1.2363
12-10-20	1.2118
13-10-20	1.2234
14-10-20	1.2356
15-10-20	1.2252
16-10-20	1.216
19-10-20	1.2129
20-10-20	1.2244
21-10-20	1.1884
22-10-20	1.2045
23-10-20	1.1827
26-10-20	1.1576
27-10-20	1.1808
28-10-20	1.1351
29-10-20	1.1096
30-10-20	1.1236
02-11-20	1.1505
03-11-20	1.1674
04-11-20	1.1881
05-11-20	1.1782
06-11-20	1.1503
09-11-20	1.2094
10-11-20	1.2269
11-11-20	1.2293
12-11-20	1.2173
13-11-20	1.1955
16-11-20	1.2126
17-11-20	1.2121
18-11-20	1.2213
19-11-20	1.2192
20-11-20	1.2236
23-11-20	1.2333
24-11-20	1.2615
25-11-20	1.273
27-11-20	1.269
30-11-20	1.2616
01-12-20	1.2425
02-12-20	1.2474
03-12-20	1.2425
04-12-20	1.2537
07-12-20	1.2559
08-12-20	1.2572
09-12-20	1.2576
10-12-20	1.2774
11-12-20	1.2693
14-12-20	1.2775
15-12-20	1.2873
16-12-20	1.2989
17-12-20	1.3148
18-12-20	1.3243
21-12-20	1.3042
22-12-20	1.2881
23-12-20	1.3084
24-12-20	1.3112
28-12-20	1.299
29-12-20	1.3106
30-12-20	1.3213
31-12-20	1.3226
04-01-21	1.304
05-01-21	1.3501
06-01-21	1.3488
07-01-21	1.3543
08-01-21	1.377
11-01-21	1.3656
12-01-21	1.3816
13-01-21	1.3756
14-01-21	1.3973
15-01-21	1.3843
19-01-21	1.3889
20-01-21	1.389
21-01-21	1.3945
22-01-21	1.3774
25-01-21	1.3833
26-01-21	1.3822
27-01-21	1.3856
28-01-21	1.381
29-01-21	1.3741
01-02-21	1.403
02-02-21	1.4206
03-02-21	1.432
04-02-21	1.4399
05-02-21	1.4438
08-02-21	1.4701
09-02-21	1.4789
10-02-21	1.4775
11-02-21	1.4728
12-02-21	1.492
16-02-21	1.5193
17-02-21	1.5284
18-02-21	1.5243
19-02-21	1.5127
22-02-21	1.5487
23-02-21	1.558
24-02-21	1.5652
25-02-21	1.5718
26-02-21	1.5371
01-03-21	1.5313
02-03-21	1.5325
03-03-21	1.5557
04-03-21	1.594
05-03-21	1.6293
08-03-21	1.6215
09-03-21	1.6199
10-03-21	1.6361
11-03-21	1.6681
12-03-21	1.6717
15-03-21	1.6635
16-03-21	1.664
17-03-21	1.6631
18-03-21	1.5909
19-03-21	1.603
22-03-21	1.6112
23-03-21	1.5665
24-03-21	1.6249
25-03-21	1.57
26-03-21	1.6097
29-03-21	1.6155
30-03-21	1.6055
31-03-21	1.5884
01-04-21	1.6409
05-04-21	1.6013
06-04-21	1.6156
07-04-21	1.6116
08-04-21	1.6106
09-04-21	1.6113
12-04-21	1.6182
13-04-21	1.627
14-04-21	1.6574
15-04-21	1.6516
16-04-21	1.6486
19-04-21	1.6508
20-04-21	1.6369
21-04-21	1.6227
22-04-21	1.6232
23-04-21	1.6482
26-04-21	1.6461
27-04-21	1.672
28-04-21	1.6974
29-04-21	1.7104
30-04-21	1.6821
03-05-21	1.7042
04-05-21	1.7386
05-05-21	1.7417
06-05-21	1.7281
07-05-21	1.7493
10-05-21	1.7587
11-05-21	1.7698
12-05-21	1.7855
13-05-21	1.7381
14-05-21	1.7618
17-05-21	1.7752
18-05-21	1.7713
19-05-21	1.7266
20-05-21	1.6986
21-05-21	1.7314
24-05-21	1.7771
25-05-21	1.781
26-05-21	1.7958
27-05-21	1.8025
28-05-21	1.7845
01-06-21	1.8125
02-06-21	1.8363
03-06-21	1.8378
04-06-21	1.8452
07-06-21	1.8419
08-06-21	1.8662
09-06-21	1.8563
10-06-21	1.8623
11-06-21	1.8444
14-06-21	1.8415
15-06-21	1.8414
16-06-21	1.8289
17-06-21	1.7931
18-06-21	1.8264
21-06-21	1.8501
22-06-21	1.8635
23-06-21	1.8888
24-06-21	1.8912
25-06-21	1.8729
28-06-21	1.8472
29-06-21	1.8617
30-06-21	1.8603
01-07-21	1.8772
02-07-21	1.9008
06-07-21	1.8321
07-07-21	1.8201
08-07-21	1.847
09-07-21	1.8747
12-07-21	1.8676
13-07-21	1.9034
14-07-21	1.8668
15-07-21	1.8369
16-07-21	1.8451
19-07-21	1.7321
20-07-21	1.7488
21-07-21	1.8116
22-07-21	1.8388
23-07-21	1.8471
26-07-21	1.8513
27-07-21	1.8528
28-07-21	1.8604
29-07-21	1.8905
30-07-21	1.891
02-08-21	1.8393
03-08-21	1.843
04-08-21	1.8161
05-08-21	1.841
06-08-21	1.8278
09-08-21	1.791
10-08-21	1.8262
11-08-21	1.8512
12-08-21	1.8449
13-08-21	1.8318
16-08-21	1.7999
17-08-21	1.7836
18-08-21	1.7686
19-08-21	1.7339
20-08-21	1.6782
23-08-21	1.7595
24-08-21	1.8109
25-08-21	1.8562
26-08-21	1.8176
27-08-21	1.8458
30-08-21	1.8592
31-08-21	1.8511
01-09-21	1.8563
02-09-21	1.8809
03-09-21	1.8723
07-09-21	1.8513
08-09-21	1.8692
09-09-21	1.8418
10-09-21	1.8841
13-09-21	1.8894
14-09-21	1.8889
15-09-21	1.9054
16-09-21	1.8967
17-09-21	1.8794
20-09-21	1.8332
21-09-21	1.8448
22-09-21	1.8682
23-09-21	1.8865
24-09-21	1.8898
27-09-21	1.9243
28-09-21	1.9173
29-09-21	1.9332
30-09-21	1.944
01-10-21	1.9949
04-10-21	2.0428
05-10-21	2.0707
06-10-21	2.0309
07-10-21	2.0515
08-10-21	2.0558
11-10-21	2.0727
12-10-21	2.0722
13-10-21	2.0811
14-10-21	2.0958
15-10-21	2.1111
18-10-21	2.1005
19-10-21	2.107
20-10-21	2.1293
21-10-21	2.0935
22-10-21	2.0761
25-10-21	2.0857
26-10-21	2.0881
27-10-21	2.0477
28-10-21	2.0375
29-10-21	2.0395
01-11-21	2.052
02-11-21	2.0663
03-11-21	2.0077
04-11-21	1.9953
05-11-21	2.0365
08-11-21	2.0328
09-11-21	2.0619
10-11-21	2.0063
11-11-21	2.0284
12-11-21	2.0178
15-11-21	2.0205
16-11-21	2.0259
17-11-21	1.9815
18-11-21	2.0003
19-11-21	1.9452
22-11-21	1.9845
23-11-21	2.0467
24-11-21	2.0369
26-11-21	1.8131
29-11-21	1.8672
30-11-21	1.7854
01-12-21	1.7965
02-12-21	1.7929
03-12-21	1.7797
06-12-21	1.8538
07-12-21	1.9137
08-12-21	1.956
09-12-21	1.9398
10-12-21	1.9488
13-12-21	1.9319
14-12-21	1.9149
15-12-21	1.911
16-12-21	1.95
17-12-21	1.9013
20-12-21	1.8596
21-12-21	1.9171
22-12-21	1.9428
23-12-21	1.9659
27-12-21	2.0055
28-12-21	2.027
29-12-21	2.0417
30-12-21	2.057
31-12-21	2.0016
03-01-22	2.0337
04-01-22	2.056
05-01-22	2.0693
06-01-22	2.0877
07-01-22	2.0873
10-01-22	2.0725
11-01-22	2.1273
12-01-22	2.1404
13-01-22	2.136
14-01-22	2.1594
18-01-22	2.1754
19-01-22	2.186
20-01-22	2.1897
21-01-22	2.1719
24-01-22	2.1383
25-01-22	2.1776
26-01-22	2.2111
27-01-22	2.2003
28-01-22	2.1964
31-01-22	2.2024
01-02-22	2.2063
02-02-22	2.2308
03-02-22	2.255
04-02-22	2.2851
07-02-22	2.2866
08-02-22	2.2488
09-02-22	2.287
10-02-22	2.2883
11-02-22	2.3273
14-02-22	2.3516
15-02-22	2.2789
16-02-22	2.3039
17-02-22	2.2904
18-02-22	2.3172
22-02-22	2.3469
23-02-22	2.3723
24-02-22	2.3644
25-02-22	2.3345
28-02-22	2.3642
01-03-22	2.4255
02-03-22	2.5366
03-03-22	2.5261
04-03-22	2.7013
07-03-22	2.7358
08-03-22	2.7285
09-03-22	2.4666
10-03-22	2.4563
11-03-22	2.542
14-03-22	2.4381
15-03-22	2.3753
16-03-22	2.349
17-03-22	2.4806
18-03-22	2.5039
21-03-22	2.581
22-03-22	2.5726
23-03-22	2.6431
24-03-22	2.5921
25-03-22	2.6284
28-03-22	2.5054
29-03-22	2.503
30-03-22	2.5876
31-03-22	2.5153
01-04-22	2.5719
04-04-22	2.6261
05-04-22	2.6135
06-04-22	2.5311
07-04-22	2.5626
08-04-22	2.619
11-04-22	2.5573
12-04-22	2.672
13-04-22	2.7254
14-04-22	2.7584
18-04-22	2.7691
19-04-22	2.6677
20-04-22	2.6809
21-04-22	2.7206
22-04-22	2.6725
25-04-22	2.613
26-04-22	2.6409
27-04-22	2.66
28-04-22	2.6909
29-04-22	2.6702
02-05-22	2.6927
03-05-22	2.7152
04-05-22	2.8408
05-05-22	2.8574
06-05-22	2.8816
09-05-22	2.7537
10-05-22	2.6876
11-05-22	2.7902
12-05-22	2.783
13-05-22	2.849
16-05-22	2.874
17-05-22	2.844
18-05-22	2.7529
19-05-22	2.7759
20-05-22	2.7807
23-05-22	2.7866
24-05-22	2.7815
25-05-22	2.8326
26-05-22	2.8863
27-05-22	2.954
31-05-22	2.8777
01-06-22	2.9091
02-06-22	2.9838
03-06-22	3.0205
06-06-22	3.0246
07-06-22	3.0828
08-06-22	3.1309
09-06-22	3.1443
10-06-22	3.1064
13-06-22	3.0795
14-06-22	3.0252
15-06-22	2.9912
16-06-22	3.033
17-06-22	2.8516
20-06-22	2.8803
21-06-22	2.8491
22-06-22	2.8281
23-06-22	2.7517
24-06-22	2.8023
27-06-22	2.8133
28-06-22	2.875
29-06-22	2.8065
30-06-22	2.7066
01-07-22	2.7826
05-07-22	2.5433
06-07-22	2.4679
07-07-22	2.585
08-07-22	2.6406
11-07-22	2.6821
12-07-22	2.5243
13-07-22	2.5008
14-07-22	2.4626
15-07-22	2.4895
18-07-22	2.5343
19-07-22	2.5748
20-07-22	2.5655
21-07-22	2.5031
22-07-22	2.4902
25-07-22	2.5442
26-07-22	2.553
27-07-22	2.6245
28-07-22	2.6007
29-07-22	2.6268
01-08-22	2.5193
02-08-22	2.5356
03-08-22	2.4542
04-08-22	2.3829
05-08-22	2.3943
08-08-22	2.4529
09-08-22	2.4806
10-08-22	2.5503
11-08-22	2.5896
12-08-22	2.5707
15-08-22	2.5076
16-08-22	2.4616
17-08-22	2.4954
18-08-22	2.5548
19-08-22	2.5676
22-08-22	2.5077
23-08-22	2.5776
24-08-22	2.5308
25-08-22	2.4955
26-08-22	2.5112
29-08-22	2.5746
30-08-22	2.4255
31-08-22	2.341
01-09-22	2.28
02-09-22	2.3344
06-09-22	2.3041
07-09-22	2.2077
08-09-22	2.2503
09-09-22	2.3376
12-09-22	2.3632
13-09-22	2.3774
14-09-22	2.4121
15-09-22	2.3198
16-09-22	2.3169
19-09-22	2.3454
20-09-22	2.3161
21-09-22	2.3159
22-09-22	2.3333
23-09-22	2.2139
26-09-22	2.1695
27-09-22	2.2319
28-09-22	2.3154
29-09-22	2.2726
30-09-22	2.2366
03-10-22	2.3265
04-10-22	2.436
05-10-22	2.4666
06-10-22	2.4799
07-10-22	2.5387
10-10-22	2.4495
11-10-22	2.4352
12-10-22	2.4162
13-10-22	2.4713
14-10-22	2.3922
17-10-22	2.3749
18-10-22	2.3516
19-10-22	2.4143
20-10-22	2.3945
21-10-22	2.4093
24-10-22	2.4255
25-10-22	2.4672
26-10-22	2.5059
27-10-22	2.5523
28-10-22	2.4909
31-10-22	2.4589
01-11-22	2.5249
02-11-22	2.608
03-11-22	2.5828
04-11-22	2.6489
07-11-22	2.5923
08-11-22	2.5645
09-11-22	2.4765
10-11-22	2.5086
11-11-22	2.5556
14-11-22	2.4719
15-11-22	2.4742
16-11-22	2.4597
17-11-22	2.3975
18-11-22	2.351
21-11-22	2.3646
22-11-22	2.4438
23-11-22	2.393
25-11-22	2.2729
28-11-22	2.2723
29-11-22	2.2878
30-11-22	2.3847
01-12-22	2.342
02-12-22	2.2804
05-12-22	2.2019
06-12-22	2.1491
07-12-22	2.0772
08-12-22	2.0491
09-12-22	2.0561
12-12-22	2.081
13-12-22	2.1609
14-12-22	2.2444
15-12-22	2.1668
16-12-22	2.1323
19-12-22	2.1776
20-12-22	2.2228
21-12-22	2.2558
22-12-22	2.2488
23-12-22	2.3836
27-12-22	2.3602
28-12-22	2.3629
29-12-22	2.3707
