# Supplementary material for: Monte-Carlo Simulation Based Value-at-Risk for Non-Gaussian Seasonal Stochastic Volatility Model
Source: Research Square preprint supplement (doi:10.21203/rs.3.rs-4090690/v1), 2024-03-22
Supplement: Supplementary file 3 [file af7a0d7f8bf465a0b96d6b90.xlsx]

## Sheet: Sheet1
Date	Price
21-11-17	49.34
22-11-17	49.38
24-11-17	49.64
27-11-17	50.19
28-11-17	50.4
29-11-17	50.62
30-11-17	50.65
01-12-17	50.55
04-12-17	50.63
05-12-17	50.77
06-12-17	50.54
07-12-17	51.02
08-12-17	51.03
11-12-17	51.11
12-12-17	50.75
13-12-17	49.71
14-12-17	49.81
15-12-17	49.61
18-12-17	50.23
19-12-17	50.69
20-12-17	50.56
21-12-17	50.67
22-12-17	51.03
26-12-17	51.41
27-12-17	51.74
28-12-17	51.87
29-12-17	51.6
02-01-18	51.49
03-01-18	51.52
04-01-18	51.45
05-01-18	51.82
08-01-18	52.23
09-01-18	52.66
10-01-18	52.42
11-01-18	52.44
12-01-18	52.52
16-01-18	52.53
17-01-18	52.89
18-01-18	53.17
19-01-18	53.48
22-01-18	53.59
23-01-18	53.85
24-01-18	53.26
25-01-18	53.44
26-01-18	53.38
29-01-18	52.95
30-01-18	52.33
31-01-18	52.14
01-02-18	52.15
02-02-18	51.19
05-02-18	50.86
06-02-18	50.61
07-02-18	49.81
08-02-18	49.95
09-02-18	49.48
12-02-18	49.69
13-02-18	50.38
14-02-18	50.37
15-02-18	50.33
16-02-18	50.62
20-02-18	51.13
21-02-18	51.17
22-02-18	51.31
23-02-18	52.1
26-02-18	52.71
27-02-18	52.35
28-02-18	50.81
01-03-18	50.5
02-03-18	50.53
05-03-18	51.26
06-03-18	51.33
07-03-18	50.73
08-03-18	50.74
09-03-18	51.71
12-03-18	51.61
13-03-18	51.5
14-03-18	51.64
15-03-18	51.43
16-03-18	51.41
19-03-18	51
20-03-18	51.16
21-03-18	51.87
22-03-18	51.56
23-03-18	51.97
26-03-18	51.85
27-03-18	51.85
28-03-18	51.82
29-03-18	51.6
02-04-18	50.66
03-04-18	51.07
04-04-18	51.08
05-04-18	51.23
06-04-18	50.5
09-04-18	50.65
10-04-18	50.97
11-04-18	51.27
12-04-18	50.94
13-04-18	50.87
16-04-18	50.84
17-04-18	50.9
18-04-18	50.93
19-04-18	51.25
20-04-18	51.24
23-04-18	51.57
24-04-18	51.18
25-04-18	51.25
26-04-18	51.22
27-04-18	50.88
30-04-18	51.04
01-05-18	50.78
02-05-18	50.75
03-05-18	51.2
04-05-18	51.87
07-05-18	52.28
08-05-18	51.82
09-05-18	52.88
10-05-18	53.24
11-05-18	53.45
14-05-18	53.78
15-05-18	54.38
16-05-18	54.33
17-05-18	54.89
18-05-18	55.23
21-05-18	55.8
22-05-18	55.63
23-05-18	55.14
24-05-18	54.83
25-05-18	53.78
29-05-18	53.75
30-05-18	54.07
31-05-18	54.06
01-06-18	55.05
04-06-18	54.67
05-06-18	54.79
06-06-18	54.47
07-06-18	54.95
08-06-18	55.17
11-06-18	55.49
12-06-18	55.33
13-06-18	56.4
14-06-18	55.49
15-06-18	54.03
18-06-18	54.79
19-06-18	54.47
20-06-18	54.42
21-06-18	54.23
22-06-18	55.32
25-06-18	55.41
26-06-18	56.4
27-06-18	56.47
28-06-18	55.92
29-06-18	55.33
02-07-18	55.12
03-07-18	54.97
05-07-18	55.47
06-07-18	55.81
09-07-18	55.96
10-07-18	55.88
11-07-18	54.79
12-07-18	55.56
13-07-18	55.25
16-07-18	53.52
17-07-18	53.93
18-07-18	54.58
19-07-18	54.66
20-07-18	54.82
23-07-18	55.83
24-07-18	56.44
25-07-18	56.74
26-07-18	56.98
27-07-18	56.48
30-07-18	56.44
31-07-18	56.08
01-08-18	55.41
02-08-18	55.81
03-08-18	55.95
06-08-18	56.31
07-08-18	56.89
08-08-18	55.7
09-08-18	56.01
10-08-18	55.87
13-08-18	55.56
14-08-18	55.96
15-08-18	55.45
16-08-18	55.75
17-08-18	56.01
20-08-18	56
21-08-18	55.88
22-08-18	56.87
23-08-18	57
24-08-18	57.37
27-08-18	57.5
28-08-18	57.42
29-08-18	57.55
30-08-18	57.48
31-08-18	57.04
04-09-18	57.28
05-09-18	56.83
06-09-18	56.38
07-09-18	56.48
10-09-18	56.55
11-09-18	57.22
12-09-18	57.93
13-09-18	57.28
14-09-18	57.73
17-09-18	58
18-09-18	58.09
19-09-18	58.22
20-09-18	57.99
21-09-18	57.93
24-09-18	58.54
25-09-18	59
26-09-18	58.76
27-09-18	59.19
28-09-18	59.69
01-10-18	60.78
02-10-18	60.83
03-10-18	62.11
04-10-18	60.94
05-10-18	61.32
08-10-18	61.33
09-10-18	61.88
10-10-18	60.37
11-10-18	58.97
12-10-18	58.62
15-10-18	57.88
16-10-18	58.05
17-10-18	57.45
18-10-18	57.24
19-10-18	57.78
22-10-18	58.99
23-10-18	58.07
24-10-18	58.11
25-10-18	58.24
26-10-18	59.09
29-10-18	59.43
30-10-18	58.38
31-10-18	58
01-11-18	56.59
02-11-18	56.85
05-11-18	57.3
06-11-18	57.94
07-11-18	60.73
08-11-18	60.3
09-11-18	59.96
12-11-18	59.8
13-11-18	57.9
14-11-18	58.37
15-11-18	56.89
16-11-18	56.59
19-11-18	56.69
20-11-18	53.15
21-11-18	54.11
23-11-18	52.09
26-11-18	52.62
27-11-18	53.29
28-11-18	53.44
29-11-18	53.88
30-11-18	52.39
03-12-18	53.76
04-12-18	54.07
06-12-18	53.17
07-12-18	52.85
10-12-18	51.56
11-12-18	51.75
12-12-18	51.94
13-12-18	52.68
14-12-18	52.09
17-12-18	52.25
18-12-18	50.44
19-12-18	51.48
20-12-18	50.87
21-12-18	50.98
24-12-18	50.02
26-12-18	52.66
27-12-18	51.08
28-12-18	50.88
31-12-18	51.9
02-01-19	52.71
03-01-19	53.07
04-01-19	53.38
07-01-19	53.28
08-01-19	54.25
09-01-19	55.46
10-01-19	55.16
11-01-19	54.11
14-01-19	53.56
15-01-19	54.18
16-01-19	54.55
17-01-19	53.93
18-01-19	53.35
22-01-19	53.76
23-01-19	53.67
24-01-19	53.69
25-01-19	53.85
28-01-19	53.42
29-01-19	53.89
30-01-19	53.57
31-01-19	52.89
01-02-19	54.15
04-02-19	53.99
05-02-19	53.7
06-02-19	53.47
07-02-19	52.84
08-02-19	52.83
11-02-19	52.97
12-02-19	53.21
13-02-19	53.84
14-02-19	53.9
15-02-19	54.34
19-02-19	54.9
20-02-19	54.98
21-02-19	54.91
22-02-19	54.67
25-02-19	53.87
26-02-19	54.04
27-02-19	54.48
28-02-19	54.36
01-03-19	53.47
04-03-19	54.45
05-03-19	54.45
06-03-19	54.37
07-03-19	54.49
08-03-19	54.16
11-03-19	54.31
12-03-19	54.38
13-03-19	54.76
14-03-19	54.57
15-03-19	54.77
18-03-19	54.9
19-03-19	54.91
20-03-19	54.81
21-03-19	54.49
22-03-19	54.09
25-03-19	54.15
26-03-19	53.98
27-03-19	53.77
28-03-19	54.03
29-03-19	53.95
01-04-19	54.05
02-04-19	53.78
03-04-19	54.04
04-04-19	53.99
05-04-19	54.08
08-04-19	54.03
09-04-19	54.37
10-04-19	54.41
11-04-19	54.41
12-04-19	54.89
15-04-19	55.32
16-04-19	55.3
17-04-19	55.01
18-04-19	54.83
22-04-19	55.01
23-04-19	55.14
24-04-19	55.15
25-04-19	54.87
26-04-19	54.4
29-04-19	54.4
30-04-19	54.54
01-05-19	54.68
02-05-19	53.67
03-05-19	53.53
06-05-19	53.96
07-05-19	53.17
08-05-19	53.72
09-05-19	53.48
10-05-19	53.37
13-05-19	53.04
14-05-19	53.46
15-05-19	53.68
16-05-19	53.67
17-05-19	53.34
20-05-19	53.93
21-05-19	54.1
22-05-19	53.52
23-05-19	52.02
24-05-19	53.06
28-05-19	53.64
29-05-19	53.6
30-05-19	52.43
31-05-19	51.01
03-06-19	51.35
04-06-19	51.28
05-06-19	50.19
06-06-19	50.93
07-06-19	51.69
10-06-19	52.02
11-06-19	52.52
12-06-19	51.31
13-06-19	51.85
14-06-19	51.85
17-06-19	51.68
18-06-19	52.64
19-06-19	52.31
20-06-19	53.51
21-06-19	53.4
24-06-19	53.73
25-06-19	54.12
26-06-19	54.3
27-06-19	54.12
28-06-19	53.58
01-07-19	53.68
02-07-19	52.43
03-07-19	53.41
05-07-19	53.16
08-07-19	53.59
09-07-19	54.07
10-07-19	54.83
11-07-19	54.2
12-07-19	53.74
15-07-19	53.42
16-07-19	52.35
17-07-19	52.49
18-07-19	51.55
19-07-19	52.47
22-07-19	52.86
23-07-19	52.48
24-07-19	51.95
25-07-19	52.22
26-07-19	52.68
29-07-19	52.09
30-07-19	52.31
31-07-19	52.41
01-08-19	50.41
02-08-19	52.02
05-08-19	51.84
06-08-19	51.42
07-08-19	50.72
08-08-19	50.79
09-08-19	51.69
12-08-19	51.53
13-08-19	53.11
14-08-19	51.77
15-08-19	51.15
16-08-19	51.09
19-08-19	51.14
20-08-19	50.77
21-08-19	50.97
22-08-19	51
23-08-19	50.68
26-08-19	50.54
27-08-19	51.3
28-08-19	51.36
29-08-19	51.25
30-08-19	50.09
03-09-19	50.21
04-09-19	51.3
05-09-19	51.39
06-09-19	51.5
09-09-19	51.68
10-09-19	51.75
11-09-19	51.18
12-09-19	50.91
13-09-19	50.37
16-09-19	52.04
17-09-19	51.64
18-09-19	51.18
19-09-19	51.09
20-09-19	51.26
23-09-19	52.12
24-09-19	51.38
25-09-19	51.22
26-09-19	51.22
27-09-19	50.99
30-09-19	50.38
01-10-19	50.43
02-10-19	50.32
03-10-19	49.86
04-10-19	50.52
07-10-19	50.37
08-10-19	50.59
09-10-19	50.46
10-10-19	50.43
11-10-19	51.09
14-10-19	51.01
15-10-19	50.4
16-10-19	50.57
17-10-19	50.6
18-10-19	50.45
21-10-19	50.68
22-10-19	50.73
23-10-19	51.22
24-10-19	51.31
25-10-19	51.6
28-10-19	51.19
29-10-19	51.26
30-10-19	50.45
31-10-19	50.43
01-11-19	51.75
04-11-19	51.39
05-11-19	51.74
06-11-19	50.88
07-11-19	51.15
08-11-19	51.44
11-11-19	51.4
12-11-19	51.5
13-11-19	51.69
14-11-19	51.2
15-11-19	51.66
18-11-19	51.23
19-11-19	50.71
20-11-19	51.49
21-11-19	52.03
22-11-19	51.63
25-11-19	51.73
26-11-19	51.92
27-11-19	51.63
29-11-19	50.08
02-12-19	50.88
03-12-19	50.96
04-12-19	51.66
05-12-19	51.32
06-12-19	51.1
09-12-19	51.13
10-12-19	51.42
11-12-19	51.14
12-12-19	51.41
13-12-19	51.36
16-12-19	51.71
17-12-19	51.41
18-12-19	51.39
19-12-19	51.27
20-12-19	51.33
23-12-19	51.44
24-12-19	51.59
26-12-19	51.56
27-12-19	51.94
30-12-19	51.9
31-12-19	51.48
02-01-20	51.85
03-01-20	51.57
06-01-20	51.67
07-01-20	51.99
08-01-20	51.21
09-01-20	51.61
10-01-20	51.48
13-01-20	51.42
14-01-20	51.5
15-01-20	51.14
16-01-20	51.41
17-01-20	51.43
21-01-20	51.72
22-01-20	51.15
23-01-20	50.1
24-01-20	49.31
27-01-20	49.52
28-01-20	49.74
29-01-20	49.69
30-01-20	49.78
31-01-20	49.76
03-02-20	49.91
04-02-20	49.91
05-02-20	50.22
06-02-20	50.94
07-02-20	51.22
10-02-20	51.38
11-02-20	51.15
12-02-20	51.06
13-02-20	50.69
14-02-20	50.81
18-02-20	51.23
19-02-20	51.51
20-02-20	51.53
21-02-20	51.36
24-02-20	51.16
25-02-20	49.74
26-02-20	49.35
27-02-20	49.09
28-02-20	47.77
02-03-20	48.67
03-03-20	48.88
04-03-20	48.96
05-03-20	48.77
06-03-20	47.9
09-03-20	44.13
10-03-20	45.39
11-03-20	45.3
12-03-20	44.82
13-03-20	43.75
16-03-20	41.03
17-03-20	40.88
18-03-20	37.32
19-03-20	38.18
20-03-20	36.77
23-03-20	37.88
24-03-20	38.63
25-03-20	39.85
26-03-20	39.26
27-03-20	39.9
30-03-20	40.3
31-03-20	40.31
01-04-20	39.2
02-04-20	39.06
03-04-20	38.35
06-04-20	39.17
07-04-20	39.56
08-04-20	39.24
09-04-20	39.39
13-04-20	40.08
14-04-20	40.91
15-04-20	39.29
16-04-20	39.29
17-04-20	39.37
20-04-20	39.01
21-04-20	35.98
22-04-20	37.6
23-04-20	36.97
24-04-20	36.76
27-04-20	36.53
28-04-20	36.78
29-04-20	36.89
30-04-20	38.01
01-05-20	36.94
04-05-20	36.87
05-05-20	37.72
06-05-20	37.05
07-05-20	37.25
08-05-20	38.83
11-05-20	37.7
12-05-20	37.5
13-05-20	37.71
14-05-20	38.26
15-05-20	38.41
18-05-20	39.87
19-05-20	39.66
20-05-20	40.43
21-05-20	40.33
22-05-20	40.11
26-05-20	41.27
27-05-20	40.9
28-05-20	41.51
29-05-20	42.01
01-06-20	42.04
02-06-20	42.33
03-06-20	42.69
04-06-20	43.02
05-06-20	43.58
08-06-20	42.5
09-06-20	43.21
10-06-20	43.39
11-06-20	41.56
12-06-20	41.42
15-06-20	42.42
16-06-20	42.87
17-06-20	42.12
18-06-20	42.18
19-06-20	42.38
22-06-20	42.94
23-06-20	42.64
24-06-20	41.55
25-06-20	41.96
26-06-20	41.89
29-06-20	42.72
30-06-20	42.03
01-07-20	42.43
02-07-20	43.06
06-07-20	43.21
07-07-20	43.27
08-07-20	43.84
09-07-20	43.55
10-07-20	43.99
13-07-20	43.6
14-07-20	43.78
15-07-20	44.03
16-07-20	43.87
17-07-20	43.95
20-07-20	44.07
21-07-20	44.38
22-07-20	44.44
23-07-20	44.18
24-07-20	44.74
27-07-20	45.08
28-07-20	44.93
29-07-20	45.12
30-07-20	44.34
31-07-20	44.71
03-08-20	45.61
04-08-20	45.74
05-08-20	45.91
06-08-20	46.1
07-08-20	45.53
10-08-20	45.76
11-08-20	45.44
12-08-20	46.06
13-08-20	45.91
14-08-20	45.8
17-08-20	46.37
18-08-20	46.26
19-08-20	46.4
20-08-20	46.21
21-08-20	45.96
24-08-20	46.48
25-08-20	46.84
26-08-20	46.75
27-08-20	46.26
28-08-20	46.73
31-08-20	46.23
01-09-20	46.55
02-09-20	45.9
03-09-20	46.1
04-09-20	45.43
08-09-20	43.52
09-09-20	44.16
10-09-20	43.9
11-09-20	43.71
14-09-20	43.88
15-09-20	44.56
16-09-20	45.02
17-09-20	45.29
18-09-20	45.1
21-09-20	43.88
22-09-20	44.05
23-09-20	44.08
24-09-20	44.37
25-09-20	44.12
28-09-20	44.36
29-09-20	43.29
30-09-20	44.04
01-10-20	43.27
02-10-20	42.08
05-10-20	43.59
06-10-20	44.3
07-10-20	43.62
08-10-20	44.18
09-10-20	43.65
12-10-20	43.06
13-10-20	43.37
14-10-20	43.76
15-10-20	43.78
16-10-20	43.65
19-10-20	43.66
20-10-20	44.13
21-10-20	43.01
22-10-20	43.43
23-10-20	42.78
26-10-20	41.95
27-10-20	42.57
28-10-20	41.28
29-10-20	40.44
30-10-20	40.7
02-11-20	41.99
03-11-20	42.08
04-11-20	43.04
05-11-20	42.74
06-11-20	41.81
09-11-20	43.55
10-11-20	43.67
11-11-20	43.98
12-11-20	43.69
13-11-20	43.01
16-11-20	43.54
17-11-20	43.49
18-11-20	43.77
19-11-20	43.46
20-11-20	43.68
23-11-20	43.85
24-11-20	44.45
25-11-20	45.19
27-11-20	45.09
30-11-20	44.85
01-12-20	44.06
02-12-20	44.15
03-12-20	43.68
04-12-20	44.39
07-12-20	44.49
08-12-20	44.61
09-12-20	44.6
10-12-20	45.05
11-12-20	44.86
14-12-20	45.24
15-12-20	45.66
16-12-20	45.85
17-12-20	46.48
18-12-20	46.79
21-12-20	46.03
22-12-20	45.43
23-12-20	46.21
24-12-20	46.37
28-12-20	45.93
29-12-20	46.2
30-12-20	46.23
31-12-20	46.14
04-01-21	45.77
05-01-21	46.55
06-01-21	46.34
07-01-21	46.7
08-01-21	47.33
11-01-21	47.57
12-01-21	48.1
13-01-21	48.53
14-01-21	48.66
15-01-21	48.24
19-01-21	48.21
20-01-21	48.1
21-01-21	48.02
22-01-21	47.5
25-01-21	47.84
26-01-21	47.64
27-01-21	47.94
28-01-21	47.58
29-01-21	47.43
01-02-21	48.29
02-02-21	48.88
03-02-21	49.21
04-02-21	49.44
05-02-21	49.68
08-02-21	50.46
09-02-21	50.7
10-02-21	50.97
11-02-21	50.8
12-02-21	51.29
16-02-21	51.88
17-02-21	52.08
18-02-21	51.95
19-02-21	51.75
22-02-21	52.95
23-02-21	53.16
24-02-21	54.52
25-02-21	54.54
26-02-21	53.05
01-03-21	52.62
02-03-21	52.57
03-03-21	53.56
04-03-21	54.54
05-03-21	56.02
08-03-21	55.64
09-03-21	55.35
10-03-21	55.35
11-03-21	56.18
12-03-21	56.07
15-03-21	56.03
16-03-21	55.87
17-03-21	56.09
18-03-21	53.81
19-03-21	54.39
22-03-21	54.61
23-03-21	52.82
24-03-21	54.44
25-03-21	52.69
26-03-21	54.2
29-03-21	54.22
30-03-21	53.57
31-03-21	52.86
01-04-21	55.28
05-04-21	54.05
06-04-21	54.8
07-04-21	55.06
08-04-21	54.31
09-04-21	54.41
12-04-21	54.96
13-04-21	55.42
14-04-21	56.86
15-04-21	56.54
16-04-21	56.24
19-04-21	56.22
20-04-21	55.67
21-04-21	55.09
22-04-21	55.55
23-04-21	56.07
26-04-21	56.03
27-04-21	56.67
28-04-21	57.03
29-04-21	57.62
30-04-21	56.52
03-05-21	57.25
04-05-21	58.23
05-05-21	58.3
06-05-21	58.15
07-05-21	58.55
10-05-21	58.77
11-05-21	59.21
12-05-21	59.96
13-05-21	57.97
14-05-21	58.74
17-05-21	59.1
18-05-21	58.73
19-05-21	57.18
20-05-21	56.41
21-05-21	57.38
24-05-21	58.92
25-05-21	58.89
26-05-21	59.1
27-05-21	59.34
28-05-21	58.81
01-06-21	59.82
02-06-21	60.46
03-06-21	60.47
04-06-21	60.97
07-06-21	61.08
08-06-21	61.61
09-06-21	61.69
10-06-21	61.79
11-06-21	61.9
14-06-21	61.99
15-06-21	62.46
16-06-21	62.63
17-06-21	61.39
18-06-21	61.74
21-06-21	62.58
22-06-21	62.91
23-06-21	63.25
24-06-21	63.55
25-06-21	63.89
28-06-21	63.22
29-06-21	63.23
30-06-21	63.31
01-07-21	64.04
02-07-21	64.25
06-07-21	62.39
07-07-21	61.56
08-07-21	62.1
09-07-21	63.29
12-07-21	63.34
13-07-21	64.55
14-07-21	63.39
15-07-21	62.86
16-07-21	63.36
19-07-21	59.41
20-07-21	59.81
21-07-21	61.95
22-07-21	62.64
23-07-21	62.76
26-07-21	62.78
27-07-21	62.69
28-07-21	63.23
29-07-21	64.26
30-07-21	64.29
02-08-21	62.42
03-08-21	62.38
04-08-21	61.22
05-08-21	62.18
06-08-21	62.08
09-08-21	60.86
10-08-21	62.04
11-08-21	62.77
12-08-21	62.74
13-08-21	62.27
16-08-21	61.47
17-08-21	60.82
18-08-21	60.08
19-08-21	58.69
20-08-21	57.46
23-08-21	60.21
24-08-21	61.74
25-08-21	62.38
26-08-21	61.58
27-08-21	62.75
30-08-21	62.96
31-08-21	62.74
01-09-21	63.03
02-09-21	64.11
03-09-21	63.74
07-09-21	63.18
08-09-21	63.5
09-09-21	62.75
10-09-21	64.02
13-09-21	64.42
14-09-21	64.28
15-09-21	65.14
16-09-21	65.15
17-09-21	64.55
20-09-21	63.23
21-09-21	63.72
22-09-21	64.92
23-09-21	65.7
24-09-21	66.09
27-09-21	67.48
28-09-21	67.27
29-09-21	67.26
30-09-21	67.15
01-10-21	68.26
04-10-21	69.48
05-10-21	70.5
06-10-21	69.15
07-10-21	69.83
08-10-21	70.17
11-10-21	71.24
12-10-21	71.38
13-10-21	71.46
14-10-21	71.94
15-10-21	72.09
18-10-21	71.76
19-10-21	72.03
20-10-21	72.87
21-10-21	71.51
22-10-21	71.4
25-10-21	72.05
26-10-21	72.39
27-10-21	71.24
28-10-21	71.07
29-10-21	70.7
01-11-21	71.2
02-11-21	71.35
03-11-21	69.58
04-11-21	69.47
05-11-21	71.45
08-11-21	71.92
09-11-21	72.42
10-11-21	70.85
11-11-21	71.1
12-11-21	70.47
15-11-21	70.46
16-11-21	70.61
17-11-21	69.37
18-11-21	70.31
19-11-21	68.62
22-11-21	69.73
23-11-21	71.51
24-11-21	71.34
26-11-21	63.61
29-11-21	65.5
30-11-21	62.17
01-12-21	62.12
02-12-21	63.13
03-12-21	63.42
06-12-21	65.86
07-12-21	67.96
08-12-21	68.62
09-12-21	67.5
10-12-21	67.9
13-12-21	67.62
14-12-21	67.18
15-12-21	66.93
16-12-21	67.57
17-12-21	66.02
20-12-21	64.59
21-12-21	66.57
22-12-21	67.17
23-12-21	68.04
27-12-21	69.57
28-12-21	69.9
29-12-21	70.54
30-12-21	70.89
31-12-21	69.28
03-01-22	70.55
04-01-22	71.55
05-01-22	71.64
06-01-22	72.34
07-01-22	72.04
10-01-22	71.4
11-01-22	73.58
12-01-22	74.21
13-01-22	74.08
14-01-22	75.11
18-01-22	76.28
19-01-22	76.79
20-01-22	77.31
21-01-22	76.76
24-01-22	75.43
25-01-22	76.64
26-01-22	77.7
27-01-22	77.07
28-01-22	77.02
31-01-22	77.55
01-02-22	77.45
02-02-22	77.9
03-02-22	79.14
04-02-22	80.2
07-02-22	80.24
08-02-22	78.89
09-02-22	79.87
10-02-22	79.8
11-02-22	81.17
14-02-22	81.89
15-02-22	79.16
16-02-22	80.05
17-02-22	79.26
18-02-22	80.02
22-02-22	81.37
23-02-22	82.11
24-02-22	80.92
25-02-22	80.27
28-02-22	81.37
01-03-22	82.68
02-03-22	86.32
03-03-22	86.73
04-03-22	93.4
07-03-22	94.92
08-03-22	95.09
09-03-22	84.95
10-03-22	85.69
11-03-22	88.98
14-03-22	85.61
15-03-22	83.24
16-03-22	81.82
17-03-22	87.04
18-03-22	88.03
21-03-22	91.93
22-03-22	91.34
23-03-22	94.16
24-03-22	91.94
25-03-22	93.25
28-03-22	88.29
29-03-22	88.44
30-03-22	91.5
31-03-22	88.62
01-04-22	90.48
04-04-22	93.49
05-04-22	92.76
06-04-22	89.59
07-04-22	90.47
08-04-22	92.17
11-04-22	89.92
12-04-22	93.67
13-04-22	95.98
14-04-22	97.03
18-04-22	97.06
19-04-22	92.57
20-04-22	93.19
21-04-22	94.57
22-04-22	92.35
25-04-22	89.91
26-04-22	91.53
27-04-22	91.73
28-04-22	92.64
29-04-22	91.82
02-05-22	92.41
03-05-22	91.28
04-05-22	95.43
05-05-22	95.7
06-05-22	97
09-05-22	92.09
10-05-22	89.65
11-05-22	93.96
12-05-22	93.7
13-05-22	96.19
16-05-22	97.16
17-05-22	95.5
18-05-22	92.84
19-05-22	95
20-05-22	94.92
23-05-22	95.94
24-05-22	96.18
25-05-22	96.88
26-05-22	99.35
27-05-22	100.16
31-05-22	99.46
01-06-22	100.7
02-06-22	102.2
03-06-22	103.79
06-06-22	103.79
07-06-22	105.56
08-06-22	107.86
09-06-22	107.52
10-06-22	106.25
13-06-22	106.16
14-06-22	104.44
15-06-22	102.52
16-06-22	104.18
17-06-22	98.12
20-06-22	99.17
21-06-22	99.35
22-06-22	96.56
23-06-22	93.29
24-06-22	94.99
27-06-22	96.5
28-06-22	99.21
29-06-22	97.3
30-06-22	93.67
01-07-22	95.27
05-07-22	86.53
06-07-22	85.36
07-07-22	88.92
08-07-22	91.31
11-07-22	91.58
12-07-22	85.13
13-07-22	86.1
14-07-22	84.67
15-07-22	85.82
18-07-22	89.81
19-07-22	90.54
20-07-22	90.72
21-07-22	88.45
22-07-22	87.49
25-07-22	89.43
26-07-22	88.52
27-07-22	91.02
28-07-22	90.59
29-07-22	92.52
01-08-22	89.25
02-08-22	90.36
03-08-22	87.51
04-08-22	85.13
05-08-22	85.51
08-08-22	87.54
09-08-22	87.28
10-08-22	88.9
11-08-22	90.92
12-08-22	89.4
15-08-22	87.29
16-08-22	85
17-08-22	86.3
18-08-22	88.39
19-08-22	88.95
22-08-22	88.78
23-08-22	91.68
24-08-22	92.72
25-08-22	90.71
26-08-22	90.5
29-08-22	93.73
30-08-22	89.53
31-08-22	87.52
01-09-22	84.99
02-09-22	85.19
06-09-22	85.43
07-09-22	80.75
08-09-22	81.8
09-09-22	85.05
12-09-22	86.21
13-09-22	85.5
14-09-22	86.5
15-09-22	82.96
16-09-22	83.16
19-09-22	83.68
20-09-22	82.37
21-09-22	81.62
22-09-22	82.27
23-09-22	77.53
26-09-22	75.45
27-09-22	76.93
28-09-22	80.2
29-09-22	79.42
30-09-22	77.75
03-10-22	81.38
04-10-22	84.17
05-10-22	85.7
06-10-22	86.51
07-10-22	89.85
10-10-22	88.4
11-10-22	86.56
12-10-22	84.74
13-10-22	86.65
14-10-22	83.55
17-10-22	83.51
18-10-22	81.29
19-10-22	83.42
20-10-22	83.3
21-10-22	83.95
24-10-22	83.59
25-10-22	84.31
26-10-22	86.68
27-10-22	87.83
28-10-22	86.61
31-10-22	85.4
01-11-22	87.19
02-11-22	88.86
03-11-22	87.18
04-11-22	91.45
07-11-22	90.73
08-11-22	88
09-11-22	85
10-11-22	85.66
11-11-22	88.16
14-11-22	85.16
15-11-22	86.25
16-11-22	85
17-11-22	81.4
18-11-22	80.11
19-11-22	80.11
20-11-22	80.11
21-11-22	80.04
22-11-22	80.95
23-11-22	77.94
24-11-22	77.94
25-11-22	76.28
26-11-22	76.28
27-11-22	76.28
28-11-22	77.24
29-11-22	78.2
30-11-22	80.55
01-12-22	81.22
02-12-22	79.98
03-12-22	79.98
04-12-22	79.98
05-12-22	76.93
06-12-22	74.25
07-12-22	72.01
08-12-22	71.46
09-12-22	71.02
09-12-22	71.02
11-12-22	71.02
12-12-22	73.17
13-12-22	75.39
14-12-22	77.28
15-12-22	76.11
16-12-22	74.29
17-12-22	74.29
18-12-22	74.29
19-12-22	75.19
