# Supplementary material for: Monte-Carlo Simulation Based Value-at-Risk for Non-Gaussian Seasonal Stochastic Volatility Model
Source: Research Square preprint supplement (doi:10.21203/rs.3.rs-4090690/v1), 2024-03-22
Supplement: Supplementary file 4 [file b9d940157e2c4cde25373260.xlsx]

## Sheet: Sheet1
Strike	Price
71	14.53
71.5	14.08
72.5	12.66
73	12.76
73.5	12.32
74	11.9
74.5	11.48
75	10.18
75.5	10.65
76	10.25
76.5	9.86
77	8.25
77.5	9.09
78	7.59
78.5	7.75
79	6.96
79.5	6.7
80	6.2
80.5	6.97
81	6.65
81.5	5.61
82	5.17
82.5	4.77
83	4.53
83.5	4.25
84	4.04
84.5	3.87
85	3.63
85.5	3.26
86	3.62
86.5	3.07
87	2.8
87.5	2.67
88	2.46
88.5	2.35
89	2.15
89.5	2.07
90	1.85
90.5	1.85
91	1.63
91.5	1.53
92	1.48
92.5	1.37
93	1.24
93.5	1.15
94	1.2
94.5	1.16
95	1
95.5	1.03
